# Supplementary material for: NBN, RAD51 and XRCC3 Polymorphisms as Potential Predictive Biomarkers of Adjuvant Radiotherapy Toxicity in Early HER2-Positive Breast Cancer
Source: MDPI journal article supplement (doi:10.3390/cancers14184365), 2022-09-08
Supplement: s1 [file s1]

**Table S1.** Association of selected polymorphisms in HRR genes with NT-proBNP and LVEF reduction.

| SNP                 | Genotype | NT-proBNP        |                    |       |                             | LVEF reduction   |            |                   |        |
|---------------------|----------|------------------|--------------------|-------|-----------------------------|------------------|------------|-------------------|--------|
|                     |          | ≥125 ng/l, N (%) | OR (95 % CI)       | P     | OR (95 % CI) <sub>adj</sub> | P <sub>adj</sub> | Yes; N (%) | OR (95 % CI)      | P      |
| NBN<br>rs1805794    | CC       | 19 (40.4)        | Ref.               |       |                             |                  | 6 (12.8)   | Ref.              |        |
|                     | CG       | 12 (26.1)        | 0.52 (0.22–1.25)   | 0.145 | 0.55 (0.23–1.35)            | 0.195            | 3 (6.5)    | 0.48 (0.11–2.03)  | 0.317  |
|                     | GG       | 5 (62.5)         | 2.46 (0.52–11.52)  | 0.254 | 1.82 (0.37–8.99)            | 0.463            | 0 (0.00)   | /                 | 0.577* |
|                     | CG+GG    | 17 (31.5)        | 0.68 (0.299–1.53)  | 0.350 | 0.68 (0.29–1.57)            | 0.367            | 3 (5.6)    | 0.40 (0.095–1.71) | 0.217  |
| NBN<br>rs709816     | AA       | 17 (43.6)        | Ref.               |       |                             |                  | 5 (12.8)   | Ref.              |        |
|                     | AG       | 14 (26.9)        | 0.48 (0.198–1.15)  | 0.099 | 0.52 (0.21–1.27)            | 0.152            | 4 (7.7)    | 0.57 (0.14–2.27)  | 0.422  |
|                     | GG       | 5 (50.0)         | 1.29 (0.32–5.21)   | 0.717 | 0.98 (0.23–4.16)            | 0.980            | 0 (0.0)    | /                 | 0.566* |
|                     | AG+GG    | 19 (30.6)        | 0.57 (0.25–1.31)   | 0.188 | 0.58 (0.25–1.37)            | 0.217            | 4 (6.5)    | 0.47 (0.12–1.87)  | 0.283  |
| NBN<br>rs1063054    | AA       | 16 (38.1)        | Ref.               |       |                             |                  | 1 (2.4)    | Ref.              |        |
|                     | AC       | 15 (31.9)        | 0.76 (0.32–1.83)   | 0.542 | 0.698 (0.28–1.72)           | 0.435            | 7 (14.9)   | 7.18 (0.84–60.99) | 0.071  |
|                     | CC       | 5 (41.7)         | 1.16 (0.32–4.28)   | 0.823 | 1.02 (0.27–3.93)            | 0.975            | 1 (8.3)    | 3.73 (0.22–64.47) | 0.366  |
|                     | AC+CC    | 20 (33.9)        | 0.83 (0.37–1.899)  | 0.664 | 0.76 (0.32–1.78)            | 0.522            | 8 (13.6)   | 6.43 (0.77–53.53) | 0.085  |
| RAD51<br>rs1801320  | GG       | 26 (35.6)        | Ref.               |       |                             |                  | 6 (8.2)    | Ref.              |        |
|                     | GC       | 10 (35.7)        | 1.00 (0.40–2.49)   | 0.993 | 1.07 (0.42–2.73)            | 0.880            | 3 (10.7)   | 1.34 (0.31–5.77)  | 0.694  |
| RAD51<br>rs1801321  | GG       | 13 (38.2)        | Ref.               |       |                             |                  | 2 (5.9)    | Ref.              |        |
|                     | GT       | 18 (33.3)        | 0.81 (0.33–1.97)   | 0.639 | 0.78 (0.31–1.94)            | 0.588            | 6 (11.1)   | 2.00 (0.38–10.54) | 0.414  |
|                     | TT       | 5 (38.5)         | 1.01 (0.27–3.76)   | 0.989 | 0.85 (0.22–3.34)            | 0.812            | 1 (7.7)    | 1.33 (0.11–16.09) | 0.821  |
|                     | GT+TT    | 23 (34.3)        | 0.84 (0.36–1.99)   | 0.699 | 0.79 (0.33–1.91)            | 0.599            | 7 (10.4)   | 1.87 (0.37–9.52)  | 0.453  |
| RAD51<br>rs12593359 | TT       | 9 (39.1)         | Ref.               |       |                             |                  | 2 (8.7)    | Ref.              |        |
|                     | GT       | 17 (30.4)        | 0.68 (0.25–1.87)   | 0.452 | 0.79 (0.28–2.24)            | 0.653            | 6 (10.7)   | 1.26 (0.24–6.76)  | 0.787  |
|                     | GG       | 10 (45.5)        | 1.296 (0.396–4.24) | 0.668 | 1.44 (0.42–4.92)            | 0.557            | 1 (4.5)    | 0.50 (0.04–5.94)  | 0.583  |
|                     | GT+TT    | 27 (34.6)        | 0.82 (0.32–2.15)   | 0.691 | 0.95 (0.35–2.55)            | 0.912            | 7 (9.0)    | 1.04 (0.20–5.36)  | 0.967  |
| XRCC3<br>rs1799794  | AA       | 19 (35.2)        | Ref.               |       |                             |                  | 4 (7.4)    | Ref.              |        |
|                     | AG       | 14 (35.9)        | 1.03 (0.44–2.44)   | 0.944 | 1.11 (0.46–2.68)            | 0.824            | 5 (12.8)   | 1.84 (0.46–7.34)  | 0.389  |
|                     | GG       | 3 (37.5)         | 1.11 (0.24–5.14)   | 0.898 | 1.28 (0.26–6.35)            | 0.765            | 0 (0.0)    | /                 | 1.000* |
|                     | AG+GG    | 17 (36.2)        | 1.04 (0.46–2.36)   | 0.918 | 1.13 (0.49–2.63)            | 0.773            | 5 (10.6)   | 1.49 (0.38–5.899) | 0.572  |
| XRCC3<br>rs861539   | CC       | 17 (38.6)        | Ref.               |       |                             |                  | 4 (9.1)    | Ref.              |        |
|                     | CT       | 14 (31.1)        | 0.72 (0.299–1.72)  | 0.457 | 0.73 (0.29–1.79)            | 0.485            | 3 (6.7)    | 0.71 (0.15–3.39)  | 0.672  |
|                     | TT       | 5 (41.7)         | 1.13 (0.31–4.16)   | 0.849 | 1.30 (0.34–4.93)            | 0.697            | 2 (16.7)   | 2.00 (0.32–12.51) | 0.459  |
|                     | CT+TT    | 19 (33.3)        | 0.79 (0.35–1.80)   | 0.581 | 0.83 (0.36–1.92)            | 0.656            | 5 (8.8)    | 0.96 (0.24–3.81)  | 0.956  |

Adj: adjusted for age; \*calculated using Fisher's exact test

CI, confidence interval; HRR, homologous recombination repair; LVEF, left ventricular ejection fraction NT-proBNP, N-terminal pro B-type natriuretic peptide; OR, odds ratio; SNP, single nucleotide polymorphism

**Table S2.** Association of *RAD51* haplotypes with NYHA class.

| Haplotype <sup>1</sup> | Estimated frequency |        | OR (95 % CI)     | P     | OR (95 % CI) <sub>adj1</sub> | P <sub>adj1</sub> | OR (95 % CI) <sub>adj2</sub> | P <sub>adj2</sub> |
|------------------------|---------------------|--------|------------------|-------|------------------------------|-------------------|------------------------------|-------------------|
|                        | NYHA 1              | NYHA 2 |                  |       |                              |                   |                              |                   |
| GGG                    | 0.497               | 0.235  | Ref.             |       |                              |                   |                              |                   |
| GTT                    | 0.325               | 0.529  | 4.27(1.45–12.58) | 0.009 | 3.69 (1.24–11.02)            | 0.019             | 4.37 (1.33–14.35)            | 0.015             |
| CGT                    | 0.110               | 0.147  | 2.39(0.66–8.65)  | 0.183 | 2.30(0.59–8.95)              | 0.231             | 2.01(0.47–8.65)              | 0.350             |

<sup>1</sup>SNP order from 5'- to 3'-end: rs1801320, rs1801321, rs12593359

Adj1: adjusted for body mass index; Adj2: adjusted for hyperlipidemia

CI, confidence interval; NYHA, New York Heart Association; OR, odds ratio; SNP, single nucleotide polymorphism

**Table S3.** Association of *XRCC3* haplotypes with LENT-SOMA grade.

| Haplotype <sup>1</sup> | Estimated frequency |               | OR (95 % CI)     | P     | OR (95 % CI) <sub>adj</sub> | P <sub>adj</sub> |
|------------------------|---------------------|---------------|------------------|-------|-----------------------------|------------------|
|                        | LENT-SOMA 1         | LENT-SOMA 2/3 |                  |       |                             |                  |
| AC                     | 0.390               | 0.379         | Ref.             |       |                             |                  |
| AT                     | 0.397               | 0.227         | 0.57 (0.26-1.27) | 0.167 | 0.57 (0.23-1.40)            | 0.219            |
| GC                     | 0.213               | 0.394         | 1.93 (0.94-3.98) | 0.074 | 2.06 (0.87-4.85)            | 0.100            |

<sup>1</sup>SNP order from 5'- to 3'-end: rs1799794, rs861539

Adj: adjusted for arterial hypertension and treatment with taxanes

CI, confidence interval; LENT SOMA, Late Effects in Normal Tissues/Subjective, Objective, Management and Analytic; OR, odds ratio; SNP, single nucleotide polymorphism
